# Supplementary material for: A Pilot Study on a Nurse Rehabilitation Program: Could It Be Applied to COVID-19 Patients?
Source: MDPI journal article supplement (doi:10.3390/ijerph192114365), 2022-11-02
Supplement: s1 [file s1]

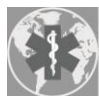

Article

# A Pilot Study on a Nurse Rehabilitation Program: Could It Be Applied to COVID-19 Patients?

## Supplementary Materials

**Table S1.** Details of the checklist.

| Teaching                                                              | Understand |    | Performs  |              |
|-----------------------------------------------------------------------|------------|----|-----------|--------------|
|                                                                       | Yes        | No | Effective | No Effective |
| Rest and relaxation techniques                                        |            |    |           |              |
| Breathing awareness and control                                       |            |    |           |              |
| Exhalation with pursed lips, with prolongation of the expiratory time |            |    |           |              |
| Incentive spirometry                                                  |            |    |           |              |
| Global costal opening                                                 |            |    |           |              |
| Diaphragmatic reeducation with resistance                             |            |    |           |              |
| Cough                                                                 |            |    |           |              |
| Energy conservation measures                                          |            |    |           |              |
